# Supplementary material
Source: PubMed Central journal article supplement (PMC7057761)
Supplement: NIHMS884596-supplement-Supplementary.pdf [file NIHMS884596-supplement-Supplementary.pdf]

## Supplementary Online Content

Haring B, Crandall CJ, Wu C, et al. Dietary patterns and fractures in postmenopausal women: results from the Women's Health Initiative. *JAMA Intern Med*. Published online March 28, 2016. doi:10.1001/jamainternmed.2016.0482.

**eTable 1.** Hazard Ratios (95% CIs) for Hip or Total Fractures by Quintiles of Dietary Pattern Scores in the Women's Health Initiative Observational Study Including Adjustment for Fall History

**eTable 2.** Bone Mineral Density (BMD) Measurements at Baseline and Year 6 by Quintiles of Dietary Pattern Scores in the Women's Health Initiative BMD Study

**eTable 3.** Lean Body Mass Measurements at Baseline and Year 6 by Quintiles of Dietary Pattern Scores in the Women's Health Initiative BMD Study

This supplementary material has been provided by the authors to give readers additional information about their work.

**eTable 1.** Hazard Ratios (95% CIs) for Hip or Total Fractures by Quintiles of Dietary Pattern Scores in the Women’s Health Initiative Observational Study Including Adjustment for Fall History<sup>1</sup>

| Quintiles of Dietary Pattern and Score |         | Hip fracture      |             |                    |                   | Total fracture |                    |                   |
|----------------------------------------|---------|-------------------|-------------|--------------------|-------------------|----------------|--------------------|-------------------|
|                                        |         | No of Individuals | No of cases | Mean Follow-up (y) | HR (95% CI)*      | No of cases    | Mean Follow-up (y) | HR (95% CI)*      |
| <b>aMED</b>                            |         |                   |             |                    |                   |                |                    |                   |
| Q1                                     | < 2     | 4866              | 145         | 12.23              | 1.00              | 1463           | 10.51              | 1.00              |
| Q2                                     | 2 - 4   | 20960             | 554         | 12.63              | 0.85 (0.71, 1.02) | 6565           | 10.77              | 1.02 (0.96, 1.08) |
| Q3                                     | 4 - 5   | 13544             | 328         | 12.97              | 0.76 (0.62, 0.93) | 4286           | 11.12              | 0.99 (0.93, 1.05) |
| Q4                                     | 5 - 6   | 12464             | 307         | 13.25              | 0.76 (0.62, 0.92) | 4005           | 11.34              | 0.98 (0.92, 1.04) |
| Q5                                     | > 6     | 15662             | 413         | 13.63              | 0.80 (0.66, 0.97) | 5325           | 11.53              | 1.01 (0.95, 1.07) |
| <b>HEI-2010</b>                        |         |                   |             |                    |                   |                |                    |                   |
| Q1                                     | < 53    | 13229             | 337         | 12.51              | 1.00              | 4061           | 10.72              | 1.00              |
| Q2                                     | 53 - 61 | 13400             | 336         | 12.88              | 0.91 (0.78, 1.06) | 4226           | 10.98              | 0.98 (0.94, 1.03) |
| Q3                                     | 61 - 67 | 13485             | 328         | 13.11              | 0.85 (0.73, 0.99) | 4311           | 11.20              | 0.97 (0.93, 1.02) |
| Q4                                     | 67 - 73 | 13538             | 330         | 13.27              | 0.80 (0.68, 0.93) | 4375           | 11.32              | 0.96 (0.92, 1.00) |
| Q5                                     | > 73    | 13844             | 416         | 13.30              | 0.91 (0.79, 1.06) | 4671           | 11.28              | 0.99 (0.95, 1.03) |
| <b>AHEI-2010</b>                       |         |                   |             |                    |                   |                |                    |                   |
| Q1                                     | < 47    | 11577             | 291         | 12.11              | 1.00              | 3442           | 10.38              | 1.00              |
| Q2                                     | 47 - 54 | 14301             | 381         | 12.65              | 0.97 (0.84, 1.14) | 4430           | 10.86              | 0.98 (0.94, 1.03) |
| Q3                                     | 54 - 59 | 12003             | 308         | 12.98              | 0.91 (0.77, 1.07) | 3754           | 11.14              | 0.96 (0.92, 1.01) |
| Q4                                     | 59 - 66 | 15386             | 376         | 13.44              | 0.87 (0.74, 1.01) | 5106           | 11.41              | 1.00 (0.96, 1.05) |
| Q5                                     | > 66    | 14229             | 391         | 13.72              | 0.96 (0.82, 1.12) | 4912           | 11.57              | 1.02 (0.97, 1.07) |

| DASH |         |       |     |       |                   |      |       |                   |
|------|---------|-------|-----|-------|-------------------|------|-------|-------------------|
| Q1   | < 20    | 9974  | 240 | 12.17 | 1.00              | 2915 | 10.44 | 1.00              |
| Q2   | 20 - 23 | 14002 | 367 | 12.66 | 0.97 (0.82, 1.14) | 4338 | 10.84 | 0.98 (0.93, 1.03) |
| Q3   | 23 - 25 | 11627 | 281 | 13.07 | 0.83 (0.69, 0.98) | 3707 | 11.13 | 0.96 (0.91, 1.01) |
| Q4   | 25 - 28 | 16609 | 423 | 13.33 | 0.82 (0.70, 0.97) | 5392 | 11.39 | 0.94 (0.90, 0.99) |
| Q5   | > 28    | 15284 | 436 | 13.53 | 0.88 (0.75, 1.04) | 5292 | 11.44 | 0.99 (0.94, 1.04) |

\*Adjusted for age, race/ethnicity, body mass index, smoking status, physical activity, self-reported health, diabetes status, history of fracture at age  $\geq 55$ , physical function score, number of chronic medical conditions, number of psychoactive medications and use of hormone therapy, bisphosphonates, calcitonin, selective estrogen receptor modulators and fall history.

<sup>1</sup> AHEI-2010, Alternate Healthy Eating Index 2010; aMED, alternate Mediterranean Diet; DASH, Dietary Approaches to Stop Hypertension; HEI-2010, Healthy Eating Index 2010; Quintile 1 (Q1) represents the least healthy quintile, whereas quintile 5 (Q5) represents the healthiest quintile.

**eTable 2.** Bone Mineral Density (BMD) Measurements at Baseline and Year 6 by Quintiles of Dietary Pattern Scores in the Women’s Health Initiative BMD Study

| Quintiles of Dietary Pattern and Score <sup>a</sup> |         | Hip BMD (g/cm <sup>2</sup> ) |                                 |                               | Total Body BMD (g/cm <sup>2</sup> ) |                                 |                               |
|-----------------------------------------------------|---------|------------------------------|---------------------------------|-------------------------------|-------------------------------------|---------------------------------|-------------------------------|
|                                                     |         | No of individuals            | Baseline Mean (SE) <sup>b</sup> | Year 6 Mean (SE) <sup>b</sup> | No of individuals                   | Baseline Mean (SE) <sup>*</sup> | Year 6 Mean (SE) <sup>*</sup> |
| <b>aMED</b>                                         |         |                              |                                 |                               |                                     |                                 |                               |
| Q1                                                  | < 2     | 1534                         | 0.84<br>(0.00)                  | 0.84<br>(0.00)                | 1509                                | 1.00<br>(0.00)                  | 1.01<br>(0.00)                |
| Q2                                                  | 2 - 4   | 1497                         | 0.85<br>(0.00)                  | 0.84<br>(0.00)                | 1473                                | 1.01<br>(0.00)                  | 1.02<br>(0.00)                |
| Q3                                                  | 4 - 5   | 1614                         | 0.84<br>(0.00)                  | 0.84<br>(0.00)                | 1585                                | 1.01<br>(0.00)                  | 1.03<br>(0.00)                |
| Q4                                                  | 5 - 6   | 1476                         | 0.85<br>(0.00)                  | 0.84<br>(0.00)                | 1455                                | 1.01<br>(0.00)                  | 1.03<br>(0.00)                |
| Q5                                                  | > 6     | 1840                         | 0.85<br>(0.00)                  | 0.85<br>(0.00)                | 1811                                | 1.02<br>(0.00)                  | 1.04<br>(0.00)                |
| <b>HEI-2010</b>                                     |         |                              |                                 |                               |                                     |                                 |                               |
| Q1                                                  | < 53    | 1565                         | 0.84<br>(0.00)                  | 0.84<br>(0.00)                | 1544                                | 1.00<br>(0.00)                  | 1.02<br>(0.00)                |
| Q2                                                  | 53 - 60 | 1583                         | 0.85<br>(0.00)                  | 0.85<br>(0.00)                | 1558                                | 1.01<br>(0.00)                  | 1.03<br>(0.00)                |
| Q3                                                  | 60 - 66 | 1597                         | 0.84<br>(0.00)                  | 0.84<br>(0.00)                | 1571                                | 1.01<br>(0.00)                  | 1.03<br>(0.00)                |
| Q4                                                  | 66 - 72 | 1563                         | 0.84<br>(0.00)                  | 0.84<br>(0.00)                | 1532                                | 1.01<br>(0.00)                  | 1.03<br>(0.00)                |
| Q5                                                  | > 72    | 1653                         | 0.85<br>(0.00)                  | 0.85<br>(0.00)                | 1628                                | 1.02<br>(0.00)                  | 1.04<br>(0.00)                |
| <b>AHEI-2010</b>                                    |         |                              |                                 |                               |                                     |                                 |                               |
| Q1                                                  | < 47    | 1473                         | 0.84<br>(0.00)                  | 0.83<br>(0.00)                | 1446                                | 1.00<br>(0.00)                  | 1.01<br>(0.00)                |
| Q2                                                  | 47 - 53 | 1499                         | 0.84<br>(0.00)                  | 0.84<br>(0.00)                | 1473                                | 1.01<br>(0.00)                  | 1.02<br>(0.00)                |
| Q3                                                  | 53 - 59 | 1689                         | 0.85<br>(0.00)                  | 0.85<br>(0.00)                | 1666                                | 1.01<br>(0.00)                  | 1.03<br>(0.00)                |
| Q4                                                  | 59 - 65 | 1553                         | 0.85<br>(0.00)                  | 0.85<br>(0.00)                | 1531                                | 1.01<br>(0.00)                  | 1.03<br>(0.00)                |
| Q5                                                  | > 65    | 1747                         | 0.84<br>(0.00)                  | 0.84<br>(0.00)                | 1717                                | 1.02<br>(0.00)                  | 1.04<br>(0.00)                |
| <b>DASH</b>                                         |         |                              |                                 |                               |                                     |                                 |                               |
| Q1                                                  | < 20    | 1199                         | 0.84<br>(0.00)                  | 0.84<br>(0.00)                | 1179                                | 1.00<br>(0.00)                  | 1.01<br>(0.00)                |
| Q2                                                  | 20 - 23 | 1677                         | 0.85<br>(0.00)                  | 0.84<br>(0.00)                | 1661                                | 1.00<br>(0.00)                  | 1.02<br>(0.00)                |
| Q3                                                  | 23 - 25 | 1362                         | 0.85<br>(0.00)                  | 0.84<br>(0.00)                | 1328                                | 1.01<br>(0.00)                  | 1.03<br>(0.00)                |
| Q4                                                  | 25 - 28 | 1922                         | 0.85<br>(0.00)                  | 0.85<br>(0.00)                | 1887                                | 1.01<br>(0.00)                  | 1.03<br>(0.00)                |
| Q5                                                  | > 28    | 1801                         | 0.85<br>(0.00)                  | 0.85<br>(0.00)                | 1778                                | 1.02<br>(0.00)                  | 1.04<br>(0.00)                |

Abbreviations: AHEI-2010, Alternate Healthy Eating Index 2010; aMED, alternate Mediterranean Diet; DASH, Dietary Approaches to Stop Hypertension; HEI-2010, Healthy Eating Index 2010; HR, hazard ratio; Q, quintile.

<sup>a</sup>Q1 represents the least healthy quintile; Q5, the healthiest quintile.

<sup>b</sup>Adjusted for age, race/ethnicity, body mass index, WHI clinical trial assignment, smoking status, physical activity, self-reported health, diabetes mellitus status, history of fracture at 55 years or older, physical function score, number of chronic medical conditions, number of psychoactive medications, and use of hormone therapy, bisphosphonates, calcitonin, and selective estrogen receptor modulators.

**eTable 3.** Lean Body Mass Measurements at Baseline and Year 6 by Quintiles of Dietary Pattern Scores in the Women’s Health Initiative BMD Study<sup>1</sup>

| Quintiles of Dietary Pattern and Score <sup>a</sup> |         | Lean body mass (kg) |                                 |                               |
|-----------------------------------------------------|---------|---------------------|---------------------------------|-------------------------------|
|                                                     |         | No of individuals   | Baseline Mean (SE) <sup>b</sup> | Year 6 Mean (SE) <sup>b</sup> |
| <b>aMED</b>                                         |         |                     |                                 |                               |
| Q1                                                  | < 2     | 1518                | 37.07 (0.13)                    | 36.62 (0.13)                  |
| Q2                                                  | 2 - 4   | 1476                | 37.31 (0.13)                    | 36.80 (0.13)                  |
| Q3                                                  | 4 - 5   | 1597                | 37.45 (0.12)                    | 36.99 (0.12)                  |
| Q4                                                  | 5 - 6   | 1461                | 37.73 (0.13)                    | 37.29 (0.12)                  |
| Q5                                                  | > 6     | 1806                | 37.78 (0.12)                    | 37.34 (0.11)                  |
| <b>HEI-2010</b>                                     |         |                     |                                 |                               |
| Q1                                                  | < 53    | 1546                | 37.32 (0.13)                    | 36.84 (0.13)                  |
| Q2                                                  | 53 - 60 | 1567                | 37.57 (0.13)                    | 37.09 (0.13)                  |
| Q3                                                  | 60 - 66 | 1582                | 37.51 (0.12)                    | 36.99 (0.12)                  |
| Q4                                                  | 66 - 72 | 1536                | 37.46 (0.12)                    | 37.02 (0.12)                  |
| Q5                                                  | > 72    | 1627                | 37.54 (0.12)                    | 37.16 (0.12)                  |
| <b>AHEI-2010</b>                                    |         |                     |                                 |                               |
| Q1                                                  | < 47    | 1458                | 37.28 (0.14)                    | 36.83 (0.13)                  |
| Q2                                                  | 47 - 53 | 1482                | 37.29 (0.13)                    | 36.80 (0.13)                  |
| Q3                                                  | 53 - 59 | 1673                | 37.49 (0.12)                    | 37.05 (0.12)                  |
| Q4                                                  | 59 - 65 | 1535                | 37.53 (0.13)                    | 37.10 (0.12)                  |
| Q5                                                  | > 65    | 1710                | 37.75 (0.12)                    | 37.26 (0.12)                  |
| <b>DASH</b>                                         |         |                     |                                 |                               |
| Q1                                                  | < 20    | 1180                | 37.40 (0.16)                    | 36.94 (0.15)                  |
| Q2                                                  | 20 - 23 | 1663                | 37.32 (0.12)                    | 36.82 (0.12)                  |
| Q3                                                  | 23 - 25 | 1350                | 37.45 (0.13)                    | 36.97 (0.13)                  |
| Q4                                                  | 25 - 28 | 1894                | 37.45 (0.11)                    | 37.08 (0.11)                  |
| Q5                                                  | > 28    | 1771                | 37.72 (0.12)                    | 37.23 (0.11)                  |

Abbreviations: AHEI-2010, Alternate Healthy Eating Index 2010; aMED, alternate Mediterranean Diet; BMD, bone mineral density; DASH, Dietary Approaches to Stop Hypertension; HEI-2010, Healthy Eating Index 2010; HR, hazard ratio; Q, quintile.

<sup>a</sup>Q1 represents the least healthy quintile; Q5, the healthiest quintile.

<sup>b</sup>Adjusted for age, race/ethnicity, body mass index, WHI clinical trial assignment, smoking status, physical activity, self-reported health, diabetes mellitus status, history of fracture at 55 years or older, physical function score, number of chronic medical conditions, number of psychoactive medications, and use of hormone therapy, bisphosphonates, calcitonin, and selective estrogen receptor modulators.
